# Supplementary material for: Intensity Matters for Musculoskeletal Health: A Cross-Sectional Study on Movement Behaviors of Older Adults from High-Income Scottish and Low-Income South African Communities
Source: MDPI journal article supplement (doi:10.3390/ijerph18084310), 2021-04-19
Supplement: s1 [file s1]

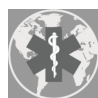

## SUPPLEMENTARY MATERIAL

**Table S1.** Movement behaviours MANOVA between Scottish and South African cohorts.

| Variables               | Scottish | South African | P value          |
|-------------------------|----------|---------------|------------------|
| SB (min/day)            | 604      | 551           | <b>0.020</b>     |
| LPA (min/day)           | 288      | 312           | <b>&lt;0.001</b> |
| MVPA (min/day)          | 20       | 6             | <b>&lt;0.001</b> |
| Nocturnal TiB (min/day) | 523      | 569           | <b>&lt;0.001</b> |

Time use composition data are reported as compositional means (mins/day). Movement behaviours have been normalised to 1440 minutes. Abbreviations: SB, sedentary behaviour. LPA, light physical activity. MVPA, moderate-to-vigorous physical activity. TiB, time-in-bed. Results of Multivariate Analysis of Variance (MANOVA) of differences in time spent in sedentary behaviours, light physical activity, moderate-to-vigorous physical activity, and sleep between Scottish and South African groups, analysed using CoDa approach.

**Table S2.** Pittsburgh Sleep Quality Index sub-components results for Scottish and South African cohorts.

| Variables                       |                      | Scottish cohort (n=150) | South African cohort (n=138) | P value          |
|---------------------------------|----------------------|-------------------------|------------------------------|------------------|
| Sleep efficiency (n, %)         | 0, no difficulty     | 52 (34.7)               | 73 (52.9)                    | <b>0.002</b>     |
|                                 | 1, fairly good       | 34 (22.7)               | 25 (18.1)                    |                  |
|                                 | 2, fairly bad        | 40 (26.7)               | 16 (11.6)                    |                  |
|                                 | 3, severe difficulty | 24 (16)                 | 24 (17.4)                    |                  |
| Subjective sleep quality (n, %) | 0, no difficulty     | 30 (20)                 | 30 (21.7)                    | 0.301            |
|                                 | 1, fairly good       | 77 (51.3)               | 72 (52.2)                    |                  |
|                                 | 2, fairly bad        | 37 (24.7)               | 23 (16.7)                    |                  |
|                                 | 3, severe difficulty | 6 (4)                   | 10 (7.2)                     |                  |
| Sleep disturbances (n, %)       | 0, no difficulty     | 3 (2)                   | 0                            | <b>&lt;0.001</b> |
|                                 | 1, fairly good       | 114 (76)                | 48 (34.8)                    |                  |
|                                 | 2, fairly bad        | 31 (20.7)               | 73 (52.9)                    |                  |
|                                 | 3, severe difficulty | 2 (1.3)                 | 17 (12.3)                    |                  |
| Use of medication (n, %)        | 0, no difficulty     | 63 (42)                 | 89 (64.5)                    | <b>&lt;0.001</b> |
|                                 | 1, fairly good       | 82 (54.7)               | 2 (1.4)                      |                  |
|                                 | 2, fairly bad        | 5 (3.3)                 | 18 (13)                      |                  |
|                                 | 3, severe difficulty | 0                       | 29 (21)                      |                  |
| Daytime dysfunction (n, %)      | 0, no difficulty     | 63 (42)                 | 22 (15.9)                    | <b>&lt;0.001</b> |
|                                 | 1, fairly good       | 82 (54.7)               | 53 (38.4)                    |                  |
|                                 | 2, fairly bad        | 5 (3.3)                 | 53 (38.4)                    |                  |
|                                 | 3, severe difficulty | 0                       | 10 (7.2)                     |                  |
| Sleep latency (n, %)            | 0, no difficulty     | 37 (24.7)               | 33 (23.9)                    | <b>&lt;0.001</b> |
|                                 | 1, fairly good       | 59 (39.3)               | 25 (18.1)                    |                  |
|                                 | 2, fairly bad        | 35 (23.3)               | 39 (28.3)                    |                  |
|                                 | 3, severe difficulty | 19 (12.7)               | 41 (29.7)                    |                  |

Results for sleep sub-components are reported as total number and percentage. Kruskal–Wallis test was used to determine differences in frequency of each variable between Scottish and South African cohort.
